# Supplementary material
Source: Research Square preprint supplement (doi:10.21203/rs.3.rs-9282628/v1)
Supplement: Supplementary file 1 [file 3ba916907b198599789acc82.docx]

**Extended data for “The geological history of plant mass extinction and terrestrial ecosystem collapse”**

**Extended Table 1.** Definitions of mass extinction and ecosystem collapse, past and present.

| **Mass extinction** | **Category** | **Source** |
| --- | --- | --- |
| Family- and stage-scale extinction rates significantly exceed background rates, exceeding the upper bound of the linear extinction rate confidence interval (CI; see citation). | Deep times; marine vertebrate, invertebrate, and protozoan genera, families, and orders; plant families; plant genera and families. | *CI 95%*1  *CI 99%*2,3 |
| Intervals when extinction rates are episodically much higher than the background extinction rate (i.e., 100 to 1000 times higher). | Contemporary times; terrestrial animal and plant species. | 4,5 |
| Background extinction rates vary  from <1% to 25% per million years; therefore, turnover above 25% indicates mass extinction. | Deep times; Marine invertebrate and plant species. | 6,7 |
| Events showing distinct peaks in magnitude and rate of extinction, independent of tabulation method. | Deep times; Marine animal genera. | 8 |
| Generic diversity loss >35% and species loss >75% (Extended Table 2). | All times. Marine and terrestrial animal and plant species | 9 |
| Increased rate of global extinction of higher taxa in several biological groups. The author notes “there is no satisfactory way to provide a universally applicable quantitative definition of a mass extinction.” | Deep times; marine genera. | 10 |
| Species extinction rate of 2.3 per year exceeds background rates of past 250 years. | Contemporary times. | 11 |
| An estimated species extinction over 75% (for a major mass extinction). | Deep times; marine invertebrate species. | 12 |
| *IUCN Red List of Threatened Species*—“critically endangered”, “endangered” and “vulnerable”— small global population sizes (<250, <2500, and <10,000 individuals, respectively) very small geographic ranges (<20,000 km2) restricted (<50, <250, and <1000 individuals in their subpopulations, respectively) or extremely fluctuating population numbers. | Contemporary times; all taxa and environments | 13 |
| **Ecosystem collapse (modern)** |  |  |
| *IUCN Red List of Ecosystems*—“Biotic or abiotic features…diagnostic components of the characteristic native biota are lost from the [ecosystem]” or “functional components (biota that perform key roles in ecosystem organisation) are greatly reduced in abundance.”  **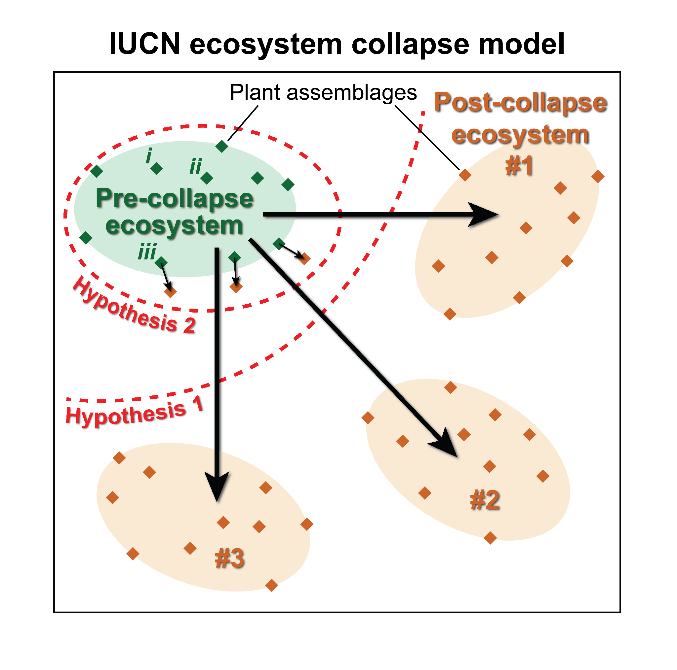**  **Extended Table 1 Figure. Schematic diagram of ecosystem collapse (modified from** 14**).** In the IUCN Red List of Ecosystems model, natural variability in ecosystem composition over time and space is captured by the transition from any state to another within the green shaded area (e.g., i to ii to iii, etc.) without the loss of the key defining features of that ecosystem. The model predicts two distinct hypotheses of ecosystem collapse: 1, when the ecosystem composition permanently transitions to an ecospace that falls well outside that defined by natural variability (here represented by three different novel, post-collapse ecospace sectors in orange); or 2, when the range of ecosystem composition permanently expands the ecospace, while still encompassing the natural variability of the pre-collapse ecosystem (here represented by the red dashed oval). | Contemporary times; all taxa and environments | 14 |
| **Ecosystem collapse (past terrestrial biotas)** |  |  |
| Ecosystem collapse in the plant fossil record – measured by a substantial and permanent reduction in the relative abundances of the dominant plant taxa and/or change in the palaeoecosystem occupied ecospace within a geologically short timeframe—based on a time-series of plant macro- and/or microfossil assemblage records (Fig. 4, details in main text). | Deep times; plant species or genera | This paper |

**Extended Table 2.** Arguments and counter arguments for mass extinction.

| **Mass Extinction** | **Published study & main conclusions** | **Method of study** | **Counter-arguments** |
| --- | --- | --- | --- |
| Late Devonian extinction interval | Prestianni *et al.* (2016)15  From the latest Devonian to c. 5 million years after the Devonian-Carboniferous boundary (DCB): “…we postulate that beside the disappearance of *Archaeopteris* there has been a continuous diversification of lignophyte taxa before and after the DCB. The available information for other plant taxa… indicate similar continuous diversification.” | Qualitative literature review of the plant macro and microfossil records of the Devonian-Carboniferous boundary. | While there may be a significant sampling and/or paucity following the DCB, there is no reason to argue that c. 4–5 million years was an insufficient timeframe to allow immigration from refugia and/or *in situ* speciation to occur leading to the observed increase in richness and disparity after the LDME (see 16 for a timeline of the post-LDME radiation). Speciation via polyploidy, for example, can be instantaneous. Additionally, there are many examples of rapid speciation and adaptive radiations in plants since the Pliocene (last 5.33 million years). |
| End-Permian extinction event | Nowak *et al.* (2019)17  “No mass extinction for land plants at the Permian–Triassic transition.” | Database of plant macro- and microfloral occurrence  records from the late Permian (Lopingian) to Middle Triassic. Taxon occurrences were binned by stage. Metrics used to support conclusions: (1) taxon extinctions, originations, and total turnover (originations + extinctions) per million years; and (2) taxon richness per stage, with sampling effort standardized by shareholder quorum subsampling. | Total diversity, even when standardized for duration length and sampling intensity, cannot provide a direct gauge of a mass extinction. Total diversity may be inflated by a pulse of originations, owing to ecological vacancy and adaptive radiation in the wake of a mass extinction thus elevated extinction rate is most appropriate18.  Presented estimates of extinction rates (fig. 2 in 17) show a major increase during the end-Permian interval (although these were not standardized for sampling effort). Specifically, the macrofossil genus extinction rate (per million years) was >2.5 times the background extinction rate. Here, background rate was calculated as the mean of all other stages for which data were compiled, and all rates were calculated with the updated stage durations19.  Emphasis on spore-pollen diversity is problematic: (1) Palynomorphs can have poor taxonomic resolution, with individual taxa representing much larger plant clades20 that can obscure species- or even genus-level extinctions. (2) Reworking of microfossils — as might be expected following a major deforestation event21 and enhanced erosion will inflate apparent diversity. (3) Post-event low-density vegetation would result in broader spore-pollen catchment areas. This would promote the collection of distal elements, further increasing apparent diversity. In contrast, relatively rare distal (and reworked) palynomorphs would be obscured among pre-event assemblages by the overwhelming abundances of local (and contemporaneous) plants.  Inadequate standardization of taxonomic synonymy, which can have major impacts on biodiversity trends22,e.g., *Dicroidium*, *Pteruchus* and *Umkomasia* represent different organ taxa that co-occur on the same plant (macrofossils), *Ginkgocycadophytus* = *Cycadopites*, *Alisporites* ~ *Falcisporites* (microfossils). |
| Rees (2002)23  A global end-Permian diversity loss of plants is best explained by biases in taphonomy (geography, climate, fossil preservation), not by catastrophic events. | Global compilation of Permian and Triassic plant genera and localities, binned into chronostratigraphic stages and six broad palaeogeographic regions. Trends of diversity and the quantity of fossil localities were compared. | As per 17, the metric used for this conclusion (stage-level diversity) is not the most valid, since net diversity tells us little about the ecological composition of the post-extinction flora. Global last occurrences (~extinctions) are the most appropriate metric for determining whether extinction rate was anomalously high.  Diversity estimates were not standardized by stage duration or sampling effort and it is not clear that taxonomic standardization was conducted to minimize record duplication (e.g., multiple organ taxa of the same plant). |
| End-Triassic extinction event | Barbacka *et al.* (2017)24  “No significant change in plant composition at the Triassic-Jurassic boundary” and “no taxonomic restructuring” of microfloras at the Triassic-Jurassic boundary. | Stage-level range-through analysis of (1) microfloral presence/absence data of higher taxonomic groups (mixed taxonomic rank > family) and (2) species-level combined micro- and macrofloral presence/absence data. | The higher-level taxonomic analyses cannot resolve species-level changes which are substantial (e.g., 25,26).  The taxon range-through approaches used assume that if a taxon is observed at the base and end of a stage then it was present throughout the stage and punctuated extirpations cannot be detected.  Barbacka et al.24 show that 47% of macrofossil species and 43% pollen and spore species from the combined datasets of 105 localities from Europe and Greenland do not cross the Triassic-Jurassic boundary despite the Rhaetian-Hettangian stages being the best sampled intervals in the Triassic and Jurassic periods. This represents a major regional scale extirpation or extinction associated with the end-Triassic. |
| Lukas and Tanner (2018)27  “The end of the Triassic encompassed temporary disruptions of the marine and terrestrial ecosystems, driven by the environmental effects of the eruption of the flood basalts of the Circum-Atlantic Magmatic Province (CAMP)”...”but these disruptions did not produce a global mass extinction.” | Qualitative review of selected literature | Lucas and Tanner27 incorporated a requirement of ‘suddenness’ and singularity (e.g., that a mass extinction cannot have multiple episodes of extinction within a stage) in their definition of mass extinction. The former criterion is not defined, and the latter is contradicted by other mass extinctions that exhibit two or more pulses (e.g., the EPE28 and LDE29).  The authors27 argue that high extinction rates and ecological compositional changes observed at most well-preserved TJB sections with plant fossils (macro and/or micro) are due to unconformities rather than evidence for truly elevated extinction levels. Taphonomic, sedimentological, stratigraphic and palaeobotanical analyses provide no support for such conclusions25,30,31.  The authors argue that observed compositional changes and extinction are merely local or regional effects rather than global evidence of extinction. Contemporary plant conservation science demonstrates that local and global extinction threat assessments mirror each other32 weakening this argument. |
| Cascales-Miñana and Cleal (2014)2  Family-level diversity loss was within background extinction rates (determined by 99% confidence intervals). | Stage-level analysis of plant families over the Phanerozoic based on presence/absence data. | Same counterarguments raised for the arguments against the end-Cretaceous event (see above), namely: exclusion of rare plant groups and low-latitude assemblages, coarse taxonomic and temporal resolution cannot resolve rapid, species-level extinctions.  In addition, this study defined significant extinction points (~events) as those with extinction rates outside the 99% confidence interval for the background rate. Although arbitrary, if this threshold was reduced to 95% (as used by2 to first identify mass extinctions of marine faunas), and using modern stage lengths, then the end-Triassic also qualifies (Fig. 3), along with the following intervals: the Carnian Stage (possibly owing to the Carnian Pluvial Episode; c. 233 Ma), the Capitanian Stage (= most likely owing to the end-Guadalupian event; c. 260 Ma) and the Roadian Stage (c. 267 Ma). |
| End-Cretaceous extinction event | Thompson and Ramírez-Barahona (2023)33  The authors find no significant elevation of extinction rates of angiosperm lineages across the end-Cretaceous. | Reconstruction of end-Cretaceous angiosperm diversification rates using phylogenetic comparative methods of living angiosperms. | The method assumes that the living ancestral members of the angiosperm clade are representative of extinct members which may have had very different traits and genomes34.  The quantitative models used perform poorly at detecting past mass extinction events when species survival is over 30% and when younger extinction events mask older ones34. |
| Cascales-Miñana and Cleal (2014)2  The authors conclude that there was no mass extinction of plants in the end-Cretaceous. | Stage-level analysis of plant families over the Phanerozoic based on presence/absence data. | Infrequently preserved plant groups were excluded yet these likely represent ecologically rare families with a higher extinction risk. Family-level and stage-level analyses cannot resolve rapid species-level extinctions. Species extinction of >75% represents mass extinction9,35. The analysis did not include fossil floras from low latitudes which have only recently been studied36 yet show some of the highest extinction rates recorded37. |

**Extended** **Table 3.** Assessing for ecosystem collapse using criteria adapted from IUCN Red List of Ecosystems38 and for plant mass extinction using a commonly used criterion.

| Questions adapted from IUCN Red List of Ecosystems criteria | Late Devonian | Mid-Late Pennsylvanian Boundary | end-Permian | end-Triassic | end-Cretaceous |
| --- | --- | --- | --- | --- | --- |
| Evidence for loss of identity of the ecosystem (e.g., biotic traits, relative abundance distribution, presence of keystone taxa)? | Yes  Extinction of *Archaeopteris*39, a keystone tree taxon40,41 with a tropical to subtropical distribution (Fig. 1). | Yes  Permanent regional extirpation of keystone lycopsid trees42,43 from most of the tropics except China44. Pronounced change in the relative abundance distribution of dominant taxa45 (Fig. 4). | Yes  Global extinction of keystone tree (glossopterids)46,47 and vining taxa (gigantopterids)48. Pronounced change in relative abundance distribution of dominant taxa49 (Fig. 4). | Yes  Extirpation of *Lepidopteris* from most regions25,30,50*.* Pronounced change in the relative abundance distribution of dominant taxa (Fig. 4). | Yes  Global extinction of plants producing *Aquilapollenites* pollen21,51. Pronounced change in the relative abundance distribution of dominant taxa52 (Fig. 4). |
| Evidence for replacement of the identity of the ecosystem by another? | Yes  Replacement by lycopsid-, zygopterid-, and tree fern-dominated floras53,54, followed by forests with greater structural complexity than Late Devonian16,55. | Yes  Replacement of lycopsid-dominated forests by tree fern dominance in the tropical biome56,57. | Yes  Peat-forming, broadleaf ecosystems replaced by sclerophyllous gymnosperms49,58,59 and/or stress-tolerant lycophytes60. | Yes  Evidence for geologically short-lived fern acme and/or cheirolepid conifer acme26,61. Permanent shift in ecological composition at regional scales25,50 (Fig. 4). | Yes  Replacement of open conifer dominated forests by closed angiosperm dominated forests in the Neotropics36. Replacement of evergreen woody taxa by more deciduous woody taxa in North America37. Global occurrence of fern acme zones21,62. |
| Evidence for loss of the abiotic features of the ecosystem (e.g., hydrological, carbon, nutrient cycling) | Yes  At least two stages of increased precipitation seasonality and/or aridification63,64. Some evidence of soil loss and nutrient dispersal into nearshore marine conditions65. Hypothesized increase in UV-B radiation66. | Yes  Drying of tropical forest biome from everwet to seasonally wet67. Increased run-off, decreased evapotranspiration68. Carbon cycle out of phase with glacial/interglacial cycling69. | Yes  Wildfire activity peak70, widespread devegetation22 led to decreased evapotranspiration, ponding, soil loss71 and freshwater and nearshore microbial blooms. | Yes  Increased wildfire72, and decreased evapotranspiration at multiple global localities73. Slower nutrient recycling inferred due to increased community-weighted leaf mass per area73. | Yes  Changes in leaf mass per area and inferred effects on decomposition and nutrient recycling rates. Enhanced phosphorus availability due to impact ejecta but reduced nitrogen availability36. |
| Have ecosystems moved outside the spatial or temporal variability in composition, function and/or structure? | Not yet quantified. | Yes  Compositional change from millions of years of compositional stasis through glacial-interglacial cycles where lycopsid-dominated forests persisted74. (Illustrated by NMDS, Fig. 4.) | Yes  (Illustrated by NMDS, Fig. 4.) | Yes  (Illustrated by NMDS, Fig. 4.) | Yes  Change in forest structure reconstructed from fossil leaf vein density and stable carbon isotopes36. (Illustrated by NMDS, Fig. 4.). |
| Does the family-level global extinction rate exceed background extinction rates (outside the 99% confidence interval) (Fig. 3) according to Cascales-Miñana & Cleal, 2014 ? | No | No | Yes | Yes | No |
| Does the family-level global extinction rate exceed background extinction rates (outside the 95% confidence interval) according to reanalysis (Fig. 3)? | No | Yes | Yes | Yes | No |

**Extended data references**

1. Raup, D. M. & Sepkoski, J. J. Mass extinctions in the marine fossil record. *Science* **215**, 1501–1503 (1982).

2. Cascales-Miñana, B. & Cleal, C. J. The plant fossil record reflects just two great extinction events. *Terra Nova* **26**, 195–200 (2014).

3. Cascales-Miñana, B., Diez, J. B., Gerrienne, P. & Cleal, C. J. A palaeobotanical perspective on the great end-Permian biotic crisis. *Hist. Biol.* **28**, 1066–1074 (2016).

4. Pimm, S. L., Russell, G. J., Gittleman, J. L. & Brooks, T. M. The future of biodiversity. *Science* **269**, 347–350 (1995).

5. De Vos, J. M., Joppa, L. N., Gittleman, J. L., Stephens, P. R. & Pimm, S. L. Estimating the normal background rate of species extinction. *Conserv. Biol.* **29**, 452–462 (2015).

6. Vajda, V. & McLoughlin, S. Extinction and recovery patterns of the vegetation across the Cretaceous–Palaeogene boundary — a tool for unravelling the causes of the end-Permian mass-extinction. *Rev. Palaeobot. Palynol.* **144**, 99–112 (2007).

7. Regan, H. M., Lupia, R., Drinnan, A. N. & Burgman, M. A. The Currency and Tempo of Extinction. *Am. Nat.* **157**, 1–10 (2001).

8. Bambach, R. K. Phanerozoic biodiversity and mass extinctions. *Annu. Rev. Earth Planet. Sci.* **34**, 127–155 (2006).

9. Barnosky, A. D. *et al.* Has the Earth’s sixth mass extinction already arrived? *Nature* **471**, 51–57 (2011).

10. Stanley, S. M. Estimates of the magnitudes of major marine mass extinctions in earth history. *Proc. Natl. Acad. Sci.* **113**, E6325–E6334 (2016).

11. Humphreys, A. M., Govaerts, R., Ficinski, S. Z., Nic Lughadha, E. & Vorontsova, M. S. Global dataset shows geography and life form predict modern plant extinction and rediscovery. *Nat. Ecol. Evol.* **3**, 1043–1047 (2019).

12. Jablonski, D. Extinctions in the fossil record. *Philos. Trans. R. Soc. B* **344**, 11–17 (1994).

13. International Union of the Conservation of Nature. *IUCN Red List Categories and Criteria: Version 3.1. Second Edition*. 32 pp. (International Union for Conservation of Nature, Gland, Switzerland, 2012).

14. International Union of the Conservation of Nature. *Guidelines for the Application of IUCN Red List of Ecosystems Categories and Criteria: Version 2.0*. (IUCN, International Union for Conservation of Nature, Gland, Switzerland, 2024). doi:10.2305/CJDF9122.

15. Prestianni, C., Sautois, M. & Denayer, J. Disrupted continental environments around the Devonian-Carboniferous Boundary: introduction of the *tener* event. *Geol. Belg.* **19**, 135–145 (2016).

16. Decombeix, A.-L., Meyer-Berthaud, B. & Galtier, J. Transitional changes in arborescent lignophytes at the Devonian–Carboniferous boundary. *J. Geol. Soc.* **168**, 547–557 (2011).

17. Nowak, H., Schneebeli-Hermann, E. & Kustatscher, E. No mass extinction for land plants at the Permian–Triassic transition. *Nat. Commun.* **10**, 384 (2019).

18. Foote, M. Origination and extinction components of taxonomic diversity: General problems. *Paleobiology* **26**, 74–102 (2000).

19. Cohen, K., Harper, D., Gibbard, P. & Car, N. The ICS international chronostratigraphic chart this decade. *Episodes* **48**, 105–115 (2025).

20. Mander, L. & Punyasena, S. W. On the taxonomic resolution of pollen and spore records of Earth’s vegetation. *Int. J. Plant Sci.* **175**, 931–945 (2014).

21. Vajda, V. & Bercovici, A. The global vegetation pattern across the Cretaceous–Paleogene mass extinction interval: A template for other extinction events. *Glob. Planet. Change* **122**, 29–49 (2014).

22. Xu, Z. *et al.* Early Triassic super-greenhouse climate driven by vegetation collapse. *Nat. Commun.* **16**, 5400 (2025).

23. Rees, P. M. Land-plant diversity and the end-Permian mass extinction. *Geology* **30**, 827–830 (2002).

24. Barbacka, M. *et al.* Changes in terrestrial floras at the Triassic-Jurassic Boundary in Europe. *Palaeogeogr. Palaeoclimatol. Palaeoecol.* **480**, 80–93 (2017).

25. Knetge, A. B. *et al.* Census collection of two fossil plant localities in Jameson Land, East Greenland supports regional ecological turnover and diversity loss at the end-Triassic mass extinction. *Palaeogeogr. Palaeoclimatol. Palaeoecol.* **679**, 113266 (2025).

26. Bonis, N. R. & Kürschner, W. M. Vegetation history, diversity patterns, and climate change across the Triassic/Jurassic boundary. *Paleobiology* **38**, 240–264 (2012).

27. Lucas, S. G. & Tanner, L. H. The missing mass extinction at the Triassic-Jurassic Boundary. in *The Late Triassic World* (ed. Tanner, L. H.) vol. 46 721–785 (Springer International Publishing, Cham, 2018).

28. Song, H., Wignall, P. B., Tong, J. & Yin, H. Two pulses of extinction during the Permian–Triassic crisis. *Nat. Geosci.* **6**, 52–56 (2013).

29. Percival, L. M. E. *et al.* Precisely dating the Frasnian–Famennian boundary: implications for the cause of the Late Devonian mass extinction. *Sci. Rep.* **8**, 9578 (2018).

30. Mander, L., Kürschner, W. M. & McElwain, J. C. An explanation for conflicting records of Triassic–Jurassic plant diversity. *Proc. Natl. Acad. Sci. U. S. A.* **107**, 15351–15356 (2010).

31. Quiroz-Cabascango, D., Vajda, V., McLoughlin, S. & Niedźwiedzki, G. Earliest Jurassic plant assemblages from Sweden reveal a low-diversity ginkgoalean and cheirolepid flora dominating the post-extinction landscape. *Ann. Bot.* mcaf143 (2025) doi:10.1093/aob/mcaf143.

32. Brito, D. *et al.* How similar are national red lists and the IUCN Red List? *Biol. Conserv.* **143**, 1154–1158 (2010).

33. Thompson, J. B. & Ramírez-Barahona, S. No phylogenetic evidence for angiosperm mass extinction at the Cretaceous–Palaeogene (K-Pg) boundary. *Biol. Lett.* **19**, 20230314 (2023).

34. Hagen, E. R. A critique of Thompson and Ramírez-Barahona (2023) or: how I learned to stop worrying and love the fossil record. *Biol. Lett.* **20**, 20240039 (2024).

35. Jablonski, D. Extinctions: A paleontological perspective. *Science* **253**, 754–757 (1991).

36. Carvalho, M. R. *et al.* Extinction at the end-Cretaceous and the origin of modern Neotropical rainforests. *Science* **372**, 63–68 (2021).

37. Wilf, P., Carvalho, M. R. & Stiles, E. The end-Cretaceous plant extinction: Heterogeneity, ecosystem transformation, and insights for the future. *Camb. Prisms Extinction* **1**, 10 (2023).

38. Keith, D. A. *et al.* The IUCN Red List of Ecosystems: Motivations, challenges, and applications. *Conserv. Lett.* **8**, 214–226 (2015).

39. Maziane, N., Higgs, K. T. & Streel, M. Biometry and paleoenvironment of *Retispora lepidophyta* (Kedo) Playford 1976 and associated miospores in the latest Famennian nearshore marine facies, eastern Ardenne (Belgium). *Rev. Palaeobot. Palynol.* **118**, 211–226 (2002).

40. Meyer‐Berthaud, B., Scheckler, S. E. & Bousquet, J. The development of *Archaeopteris*: new evolutionary characters from the structural analysis of an early Famennian trunk from southeast Morocco. *Am. J. Bot.* **87**, 456–468 (2000).

41. Cressler, W. L. Plant paleoecology of the Late Devonian Red Hill locality, north-central Pennsylvania, an *Archaeopteris*-dominated wetland plant community and early tetrapod site. in *Wetlands through Time* 79–102 (Geological Society of America, 2006). doi:10.1130/2006.2399(04).

42. Pfefferkorn, H. W., Gastaldo, R. A., DiMichele, W. A. & Phillips, T. L. Pennsylvanian tropical floras from the United States as a record of changing climate. in *Resolving the Late Paleozoic Ice Age in Time and Space* vol. 441 305–316 (Geological Society of America, 2008).

43. DiMichele, W. A. *et al.* Kasimovian floristic change in tropical wetlands and the Middle–Late Pennsylvanian Boundary Event. *Geol. Soc. Lond. Spec. Publ.* **535**, 293–335 (2023).

44. Tian, B. & Guo, G. A new species of lepidodendroid fructification-*Achlamydocarpon sinensis*. *Acta Bot. Sin.* **29**, 218–222 (1987).

45. Phillips, T. L., Peppers, R. A., Avcin, M. J. & Laughnan, P. F. Fossil plants and coal: Patterns of change in Pennsylvanian coal swamps of the Illinois Basin. *Science* **184**, 1367–1369 (1974).

46. Saxena, A., Cleal, C. J. & Singh, K. J. The Permian–Triassic boundary in Peninsular India and the extinction of the Glossopteridales. *Gondwana Res.* **137**, 318–330 (2025).

47. Turner, H.-A., McLoughlin, S. & Mays, C. Comprehensive survey of Early to Middle Triassic Gondwanan floras reveals under-representation of plant-arthropod interactions. *Front. Ecol. Evol.* **12**, 1419254 (2024).

48. Zhang, H. *et al.* The terrestrial end-Permian mass extinction in South China. *Palaeogeogr. Palaeoclimatol. Palaeoecol.* **448**, 108–124 (2016).

49. Mays, C. *et al.* Refined Permian–Triassic floristic timeline reveals early collapse and delayed recovery of south polar terrestrial ecosystems. *GSA Bull.* **132**, 1489–1513 (2020).

50. McElwain, Popa, M. E., Hesselbo, S. P., Haworth, M. & Surlyk. Macroecological responses of terrestrial vegetation to climatic and atmospheric change across the Triassic/Jurassic boundary in East Greenland. *Paleobiology* **33**, 547–573 (2007).

51. Samant, B., Mohabey, D. M. & Paudayal, K. N. *Aquilapollenites* and other triprojectate pollen from the Late Cretaceous to Early Paleocene Deccan intertrappean deposits of India. *Palynology* **37**, 298–315 (2013).

52. Wilson Deibel, P. K., Wilson Mantilla, G. P. & Strömberg, C. A. E. Plant taxonomic turnover and diversity across the Cretaceous/Paleogene boundary in northeastern Montana. *Paleobiology* **50**, 608–626 (2024).

53. Galtier, J., Meyer-Berthaud, B. & Rowe, N. P. Tournaisian plants from the ‘Lydiennes’ Formation of the Montagne Noire (France). *Cour. Forschungsinstitut Senckenberg* **100**, 109–117 (1988).

54. Hübers, M., Bomfleur, B., Krings, M., Pott, C. & Kerp, H. A reappraisal of Mississippian (Tournaisian and Visean) adpression floras from central and northwestern Europe. *Zitteliana A* **54**, 39–52 (2014).

55. Galtier, J. *Pitus*, a giant tree of the Early Carboniferous time. in *Secrets of Petriﬁed Plants– Fascination from Millions of Years* (eds Dernbach, U. & Tidwell, W. D.) 34–37 (D’oro Publishers, Heppenheim, 2002).

56. DiMichele, W. A., Mamay, S. H., Chaney, D. S., Hook, R. W. & John Nelson, W. An early Permian flora with late Permian and Mesozoic affinities from north-central Texas. *J. Paleontol.* **75**, 449–460 (2001).

57. Krings, M., Kerp, H., Taylor, T. N. & Taylor, E. L. How Paleozoic vines and lianas got off the ground: On scrambling and climbing Carboniferous–Early Permian pteridosperms. *Bot. Rev.* **69**, 204–224 (2003).

58. Grauvogel-Stamm, L. & Ash, S. R. Recovery of the Triassic land flora from the end-Permian life crisis. *Comptes Rendus Palevol* **4**, 593–608 (2005).

59. Xu, Z. *et al.* End Permian to Middle Triassic plant species richness and abundance patterns in South China: Coevolution of plants and the environment through the Permian–Triassic transition. *Earth-Sci. Rev.* **232**, 104136 (2022).

60. Looy, C. V., van Konijnenburg-van Cittert, J. H. A. & Duijnstee, I. A. P. Proliferation of isoëtalean lycophytes during the Permo-Triassic biotic crises: A proxy for the state of the terrestrial biosphere. *Front. Earth Sci.* **9**, 615370 (2021).

61. Lindström, S. Palynofloral patterns of terrestrial ecosystem change during the end-Triassic event – a review. *Geol. Mag.* **153**, 223–251 (2016).

62. Vajda, V. & McLoughlin, S. Fungal proliferation at the Cretaceous–Tertiary boundary. *Science* **303**, 1489 (2004).

63. Racki, G. A volcanic scenario for the Frasnian–Famennian major biotic crisis and other Late Devonian global changes: More answers than questions? *Glob. Planet. Change* **189**, 103174 (2020).

64. Marshall, J. E. A., Astin, T. R., Tel’nova, O. P. & Gaca, P. Terrestrial palaeoclimate, mercury, atmospheric CO2 and land plants through the Late Devonian mass extinction. *J. Geol. Soc.* **182**, jgs2024-187 (2025).

65. Algeo, T. J. & Shen, J. Theory and classification of mass extinction causation. *Natl. Sci. Rev.* **11**, nwad237 (2024).

66. Marshall, J. E. A., Lakin, J., Troth, I. & Wallace-Johnson, S. M. UV-B radiation was the Devonian-Carboniferous boundary terrestrial extinction kill mechanism. *Sci. Adv.* **6**, aba0768 (2020).

67. DiMichele, W. A., Montañez, I. P., Poulsen, C. J. & Tabor, N. J. Climate and vegetational regime shifts in the late Paleozoic ice age earth. *Geobiology* **7**, 200–226 (2009).

68. Bashforth, A. R. *et al.* The environmental implications of upper Paleozoic plant-fossil assemblages with mixtures of wetland and drought-tolerant taxa in tropical Pangea. *Geobios* **68**, 1–45 (2021).

69. Fang, Q. *et al.* Synchronizing climate-carbon cycle heartbeats in the Phanerozoic vegetated icehouses. *Nat. Commun.* **16**, 9196 (2025).

70. Mays, C. & McLoughlin, S. End-Permian burnout: The role of Permian-Triassic wildfires in extinction, carbon cycling and environmental change in eastern Gondwana. *Palaios* **37**, 292–317 (2022).

71. Vajda, V. *et al.* End-Permian (252 Mya) deforestation, wildfires and flooding—an ancient biotic crisis with lessons for the present. *Earth Planet. Sci. Lett.* **529**, 115875 (2020).

72. Belcher, C. M. *et al.* Increased fire activity at the Triassic/Jurassic boundary in Greenland due to climate-driven floral change. *Nat. Geosci.* **3**, 426–429 (2010).

73. Soh, W. K. *et al.* Palaeo leaf economics reveal a shift in ecosystem function associated with the end-Triassic mass extinction event. *Nat. Plants* **3**, 17104 (2017).

74. DiMichele, W. A. Wetland-dryland vegetational dynamics in the Pennsylvanian ice age tropics. *Int. J. Plant Sci.* **175**, 123–164 (2014).
