# Supplementary material
Source: Research Square preprint supplement (doi:10.21203/rs.3.rs-9282628/v1)
Supplement: Supplementary file 1 [file 3946d6a995b82058bc68d7e0.xlsx]

## Sheet: Phillips et al (1974) raw
Supplementary Table 2 - Proportions of spore-pollen morphogroups in Pennsylvanian coal swamps of the Illinois Basin (Phillips et al., 1974); excluding Monoletes
	GLOBAL STAGE	?BASHKIRIAN		MOSCOVIAN (MIDDLE PENNSYLVANIAN)
	REGIONAL STAGE	MORROWAN										ATOKAN								DESMOINESIAN (c. 312.6–305.7 Ma)
SPORE-POLLEN MORPHOGROUPS	TIME BIN #	1	2	3	4	5	6	7	8	9	10	11	12	13	14	15	16	17	18	19	20	21	22	23	24	25	26	27	28	29	30	31	32	33	34	35	36	37	38	39	40	41	42	43	44	45	46	47	48
Coeneopteridales, Filicales, small ferns	GROUP CODE
Granulatisporites, Reticulatisporites and other genera	A	6.119	8.731	3.396	7.463	4.59	4.701	1.567	2.687	3.881	3.806	5.485	5.485	16.119	12.201	4.925	4.925	2.799	8.731	1.567	3.358	2.127	12.985	2.052	3.582	2.351	4.254	2.127	2.351	4.478	2.575	1.455	3.358	4.142	2.239	2.295	2.743	3.358	2.351	2.351	4.59	1.399	6.493	1.455	1.231	2.687	1.455	1.455	3.47
Cyclogranisporites spp.	B	0	0	0	0	0	0	0	0	0	0	0	1.679	1.623	5.317	0	1.399	1.567	0	0	0	1.455	0	0	0	0	0	0	0	1.399	0	0	0	0	1.511	1.511	0	0	1.455	1.455	1.679	1.623	1.623	0	0	0	1.511	1.399	1.511
Marattiales
Thymospora, Laevigatosporites spp., Torispora	C	0	0	0	0	0	0	0	0	0	0	0	0	0	0	7.78	17.071	4.142	18.582	20.989	20.933	31.007	8.06	2.649	6.604	10.69	13.881	11.978	18.974	17.015	6.269	3.19	9.067	5.653	15.224	7.612	8.619	15.392	6.828	18.75	24.011	17.463	24.683	19.59	5.317	9.067	6.213	1.343	7.724
Punctatisporites spp., Laeviatosporites spp. and other genera	D	1.343	1.231	1.493	1.343	1.418	1.493	1.343	1.418	1.567	1.642	1.343	1.567	1.399	1.623	21.716	3.414	5.037	8.675	9.011	8.899	17.015	2.183	2.91	3.134	8.619	15.168	8.451	11.978	5.877	1.511	1.903	14.16	3.582	9.347	9.627	16.399	4.198	10.075	16.119	7.5	12.034	7.052	6.94	3.358	6.604	10.187	11.922	9.235
Arborescent lycopods
Lycospora	E	52.724	52.724	58.209	50.97	44.627	37.239	45.373	50.149	58.582	52.836	45.746	37.78	11.306	3.918	7.164	11.474	31.567	7.108	13.097	13.153	3.862	7.22	53.955	23.619	25.075	7.22	25.858	20.989	31.399	29.608	55.746	32.519	39.571	34.757	38.34	9.851	24.907	41.194	28.209	18.358	24.235	15.112	38.563	52.761	45.896	32.799	30.896	48.731
Crassispora, Cappasporites	F	0	1.567	2.015	2.164	1.567	2.463	7.164	2.313	1.642	2.388	2.388	1.343	1.175	1.567	12.929	1.287	1.231	1.175	10.075	10.075	2.687	5.989	3.47	10.802	1.343	11.418	9.235	11.026	1.175	20.877	2.183	2.015	2.015	1.903	3.582	3.582	3.526	5.989	2.91	8.619	4.03	11.754	3.582	3.806	5.037	11.922	24.515	5.261
Endosporites	G	0	0	0	0	0	0	0	0	0	0	1.418	1.399	6.884	1.399	2.519	1.343	1.343	1.343	1.119	1.231	1.231	1.399	2.854	5.373	15.392	1.231	1.287	2.351	1.231	2.295	1.511	1.231	1.287	1.343	3.526	0	1.231	1.343	1.119	1.343	2.631	1.511	1.343	1.231	1.399	2.631	1.231	1.231
Herbaceous lycopods
Densosporites, Cirratriradites	H	4.328	2.015	1.269	3.657	11.194	19.328	8.582	10.821	1.418	5.522	10.746	16.399	17.295	1.343	1.399	14.104	1.287	1.623	2.519	2.407	1.343	1.399	1.455	2.519	1.455	1.399	1.063	2.463	1.175	1.399	0	1.343	1.231	1.063	1.399	1.231	2.295	1.343	1.343	1.343	1.343	1.511	0	0	1.343	1.175	1.063	1.175
Sphenopsida
Calamospora, Laevigatosporites spp.	I	1.045	1.231	1.194	2.537	2.687	1.493	1.418	1.418	2.836	1.418	4.627	2.463	4.31	24.963	7.22	13.209	15.056	9.291	7.612	7.556	7.612	13.881	3.078	4.03	2.575	5.709	5.597	5.653	3.302	2.463	1.679	3.414	7.388	4.478	2.407	12.034	8.619	2.351	2.631	4.59	8.619	4.59	4.701	3.358	3.246	1.399	1.231	2.631
Cordaitales
Florinites	J	0	0	1.269	2.687	1.119	0.896	1.045	1.269	1.343	1.269	3.507	3.526	12.369	19.478	6.493	2.519	7.276	9.235	8.284	8.396	2.91	17.966	1.399	9.403	3.75	11.754	7.276	15.672	2.407	11.978	2.183	4.366	4.422	8.899	2.966	3.078	18.078	3.526	1.455	1.175	1.175	1.231	1.343	1.231	1.231	2.295	1.175	1.231
Seed ferns
Vesicaspora	K	0	0	0	0	0	0	0	0.075	0	0	0	0	0	0	0	0	0	0	0	0	0	0	0	0	1.791	1.119	1.343	1.455	0	1.231	0	1.287	3.75	2.351	1.455	9.571	1.511	1.455	1.511	2.407	1.455	2.407	3.526	0	1.511	3.246	0	1.287
[truncated: 28 more columns]

## Sheet: Phillips et al (1974)-%
Supplementary Table 2 - Proportions of spore-pollen morphogroups in Pennsylvanian coal swamps of the Illinois Basin (Phillips et al., 1974); excluding Monoletes, rescaled to 100%
	GLOBAL STAGE	?BASHKIRIAN		MOSCOVIAN (MIDDLE PENNSYLVANIAN)
	REGIONAL STAGE	MORROWAN										ATOKAN								DESMOINESIAN (c. 312.6–305.7 Ma)
SPORE-POLLEN MORPHOGROUPS	TIME BIN #	1	2	3	4	5	6	7	8	9	10	11	12	13	14	15	16	17	18	19	20	21	22	23	24	25	26	27	28	29	30	31	32	33	34	35	36	37	38	39	40	41	42	43	44	45	46	47	48
Coeneopteridales, Filicales, small ferns	GROUP CODE
Granulatisporites, Reticulatisporites and other genera	A	9.33358	12.935	4.93282	10.5378	6.83015	6.9528	2.35667	3.83036	5.44557	5.52547	7.28807	7.65623	22.2392	16.9909	6.82653	6.96162	3.92539	13.2765	2.10978	4.41796	2.98531	18.2676	2.77966	5.18634	3.21874	5.81521	2.866	2.53035	6.44706	3.21048	2.08304	4.61517	5.67079	2.69386	3.07147	4.08744	4.04019	3.01758	3.01979	6.07022	1.84062	8.32788	1.79534	1.70279	3.44394	1.94433	1.9087	4.15634
Cyclogranisporites spp.	B	0	0	0	0	0	0	0	0	0	0	0	2.34363	2.23924	7.40436	0	1.97752	2.1976	0	0	0	2.04213	0	0	0	0	0	0	0	2.01417	0	0	0	0	1.81796	2.02222	0	0	1.86754	1.86891	2.22046	2.13533	2.08165	0	0	0	2.01916	1.83524	1.80986
Marattiales
Thymospora, Laevigatosporites spp., Torispora	C	0	0	0	0	0	0	0	0	0	0	0	0	0	0	10.7838	24.1303	5.80885	28.256	28.2593	27.5405	43.5192	11.339	3.58836	9.56187	14.6356	18.9753	16.1396	20.4215	24.4968	7.81612	4.56693	12.4615	7.73949	18.3168	10.1874	12.8435	18.5189	8.76396	24.0839	31.7543	22.9755	31.6583	24.1724	7.35479	11.6212	8.30249	1.76177	9.25174
Punctatisporites spp., Laeviatosporites spp. and other genera	D	2.04854	1.82373	2.16864	1.89633	2.11006	2.20816	2.01979	2.02138	2.19871	2.38382	1.78448	2.18729	1.93019	2.26016	30.1005	4.82578	7.06402	13.1913	12.1323	11.708	23.881	3.0711	3.94191	4.53769	11.8002	20.7346	11.3872	12.8918	8.46123	1.8839	2.72441	19.4612	4.90409	11.2459	12.8841	24.4367	5.05083	12.9316	20.7044	9.91867	15.8328	9.04485	8.56336	4.64499	8.46439	13.613	15.6395	11.0616
Arborescent lycopods
Lycospora	E	80.4222	78.1108	84.5508	71.9702	66.4072	55.0767	68.2383	71.4882	82.1984	76.7062	60.7839	52.7352	15.5988	5.45614	9.93	16.2188	44.2704	10.8085	17.6336	17.3048	5.42043	10.1573	73.088	34.1977	34.33	9.86973	34.842	22.5902	45.2057	36.9149	79.8082	44.6935	54.1764	41.818	51.3116	14.6793	29.9669	52.8738	36.2337	24.2783	31.8852	19.3826	47.5834	72.9822	58.8252	43.8296	40.53	58.3696
Crassispora, Cappasporites	F	0	2.32152	2.92686	3.05559	2.33178	3.64279	10.7742	3.29722	2.30395	3.46685	3.173	1.87462	1.62114	2.18218	17.9209	1.81921	1.72639	1.78672	13.5648	13.2552	3.77128	8.42548	4.7005	15.6401	1.83869	15.6084	12.4436	11.8671	1.69167	26.0292	3.12527	2.76938	2.75872	2.2896	4.7939	5.33766	4.24231	7.68707	3.73781	11.3985	5.30214	15.0756	4.41988	5.26469	6.45595	15.9315	32.1593	6.30158
Endosporites	G	0	0	0	0	0	0	0	0	0	0	1.88413	1.95279	9.49779	1.94822	3.49158	1.89837	1.88346	2.04218	1.5066	1.61957	1.72774	1.96815	3.86606	7.77952	21.0731	1.68277	1.73415	2.53035	1.77229	2.86138	2.16321	1.69186	1.76202	1.61583	4.71895	0	1.48108	1.72378	1.43732	1.7761	3.46152	1.938	1.65714	1.70279	1.79311	3.51583	1.61485	1.47448
Herbaceous lycopods
Densosporites, Cirratriradites	H	6.60169	2.98523	1.84327	5.16372	16.6572	28.5862	12.9068	15.4255	1.98964	8.01672	14.2785	22.8905	23.8618	1.87024	1.93915	19.9364	1.80492	2.46795	3.39154	3.16677	1.88494	1.96815	1.97096	3.64724	1.99203	1.91243	1.43233	2.6509	1.69167	1.74426	0	1.84579	1.68535	1.27895	1.87232	1.83436	2.76123	1.72378	1.72505	1.7761	1.76694	1.938	0	0	1.72133	1.57016	1.39446	1.4074
Sphenopsida
Calamospora, Laevigatosporites spp.	I	1.59398	1.82373	1.73433	3.58227	3.99839	2.20816	2.13259	2.02138	3.97929	2.05862	6.14802	3.43798	5.94647	34.7631	10.0076	18.6713	21.1149	14.128	10.2487	9.94106	10.6837	19.5282	4.16949	5.835	3.52542	7.80419	7.5416	6.08425	4.75395	3.07084	2.40372	4.69214	10.1149	5.38772	3.22136	17.9323	10.37	3.01758	3.37945	6.07022	11.3397	5.88711	5.80062	4.64499	4.16042	1.8695	1.61485	3.15139
Cordaitales
Florinites	J	0	0	1.84327	3.79407	1.66513	1.32519	1.57162	1.80898	1.88441	1.84231	4.65985	4.92176	17.0654	27.1247	8.99993	3.56068	10.2041	14.0429	11.1534	11.0462	4.08427	25.275	1.8951	13.6145	5.1341	16.0677	9.80395	16.8676	3.4654	14.934	3.12527	6.00055	6.05413	10.7069	3.96949	4.58664	21.7506	4.52573	1.86891	1.55392	1.54591	1.57887	1.65714	1.70279	1.57778	3.06683	1.54139	1.47448
Seed ferns
Vesicaspora	K	0	0	0	0	0	0	0	0.106914	0	0	0	0	0	0	0	0	0	0	0	0	0	0	0	0	2.45205	1.52967	1.80961	1.566	0	1.5348	0	1.76883	5.1341	2.82861	1.94727	14.2621	1.81796	1.86754	1.94084	3.18323	1.9143	3.0872	4.35078	0	1.93666	4.33766	0	1.54156
[truncated: 28 more columns]

## Sheet: Phillips et al (1974)-%trans
Supplementary Table 2 - Proportions of spore-pollen morphogroups in Pennsylvanian coal swamps of the Illinois Basin (Phillips et al., 1974); excluding Monoletes, rescaled to 100% and square-root transformed
	GLOBAL STAGE	?BASHKIRIAN		MOSCOVIAN (MIDDLE PENNSYLVANIAN)
	REGIONAL STAGE	MORROWAN										ATOKAN								DESMOINESIAN (c. 312.6–305.7 Ma)
SPORE-POLLEN MORPHOGROUPS	TIME BIN #	1	2	3	4	5	6	7	8	9	10	11	12	13	14	15	16	17	18	19	20	21	22	23	24	25	26	27	28	29	30	31	32	33	34	35	36	37	38	39	40	41	42	43	44	45	46	47	48
Coeneopteridales, Filicales, small ferns	GROUP CODE
Granulatisporites, Reticulatisporites and other genera	A	3.05509	3.59653	2.221	3.2462	2.61346	2.63682	1.53515	1.95713	2.33357	2.35063	2.69964	2.76699	4.71585	4.122	2.61276	2.63849	1.98126	3.64369	1.45251	2.10189	1.7278	4.27407	1.66723	2.27735	1.79408	2.41147	1.69293	1.59071	2.53911	1.79178	1.44327	2.1483	2.38134	1.6413	1.75256	2.02174	2.01002	1.73712	1.73776	2.46378	1.35669	2.88581	1.3399	1.30491	1.85579	1.39439	1.38156	2.03871
Cyclogranisporites spp.	B	0	0	0	0	0	0	0	0	0	0	0	1.53089	1.49641	2.7211	0	1.40624	1.48243	0	0	0	1.42903	0	0	0	0	0	0	0	1.41921	0	0	0	0	1.34832	1.42205	0	0	1.36658	1.36708	1.49012	1.46128	1.44279	0	0	0	1.42097	1.35471	1.34531
Marattiales
Thymospora, Laevigatosporites spp., Torispora	C	0	0	0	0	0	0	0	0	0	0	0	0	0	0	3.28388	4.91226	2.41016	5.31564	5.31594	5.24791	6.59691	3.36735	1.8943	3.09223	3.82565	4.35606	4.01741	4.51901	4.94943	2.79573	2.13704	3.53009	2.78199	4.27981	3.19177	3.58378	4.30336	2.9604	4.90753	5.63509	4.79328	5.62657	4.91654	2.71197	3.40899	2.8814	1.32732	3.04167
Punctatisporites spp., Laeviatosporites spp. and other genera	D	1.43127	1.35046	1.47263	1.37707	1.4526	1.48599	1.42119	1.42175	1.48281	1.54396	1.33584	1.47895	1.38931	1.50338	5.48639	2.19677	2.65782	3.63198	3.48314	3.42169	4.88682	1.75246	1.98543	2.13019	3.43515	4.55353	3.37449	3.59051	2.90882	1.37255	1.65058	4.41149	2.21452	3.35349	3.58944	4.94335	2.24741	3.59605	4.55021	3.14939	3.97904	3.00747	2.92632	2.15522	2.90936	3.68958	3.95468	3.3259
Arborescent lycopods
Lycospora	E	8.96784	8.83803	9.19515	8.48352	8.14906	7.42137	8.26065	8.45507	9.06634	8.75821	7.79641	7.2619	3.94953	2.33584	3.15119	4.02726	6.6536	3.28763	4.19924	4.1599	2.32818	3.18705	8.54915	5.84788	5.85918	3.14161	5.90271	4.75291	6.72352	6.07577	8.93354	6.68532	7.36046	6.46668	7.16321	3.83136	5.4742	7.27144	6.01944	4.9273	5.6467	4.40256	6.89807	8.54296	7.66976	6.62039	6.36632	7.64
Crassispora, Cappasporites	F	0	1.52365	1.71081	1.74802	1.52702	1.90861	3.28241	1.81582	1.51788	1.86195	1.78129	1.36917	1.27324	1.47722	4.2333	1.34878	1.31392	1.33668	3.68305	3.64077	1.94198	2.90267	2.16806	3.95476	1.35598	3.95074	3.52755	3.44487	1.30064	5.10188	1.76784	1.66415	1.66094	1.51314	2.1895	2.31034	2.05969	2.77256	1.93334	3.37617	2.30264	3.88273	2.10235	2.29449	2.54086	3.99143	5.67091	2.51029
Endosporites	G	0	0	0	0	0	0	0	0	0	0	1.37264	1.39742	3.08185	1.39579	1.86858	1.37781	1.37239	1.42905	1.22744	1.27262	1.31444	1.40291	1.96623	2.78918	4.59054	1.29722	1.31687	1.59071	1.33128	1.69156	1.47078	1.30072	1.32741	1.27115	2.17231	0	1.217	1.31293	1.19888	1.33271	1.86052	1.39212	1.2873	1.30491	1.33907	1.87505	1.27077	1.21428
Herbaceous lycopods
Densosporites, Cirratriradites	H	2.56937	1.72778	1.35767	2.27238	4.08133	5.34661	3.59261	3.92753	1.41055	2.83138	3.77869	4.7844	4.88485	1.36757	1.39253	4.46502	1.34347	1.57097	1.84161	1.77954	1.37293	1.40291	1.40391	1.90977	1.41139	1.38291	1.1968	1.62816	1.30064	1.3207	0	1.3586	1.29821	1.13091	1.36833	1.35438	1.6617	1.31293	1.31341	1.33271	1.32926	1.39212	0	0	1.312	1.25306	1.18087	1.18634
Sphenopsida
Calamospora, Laevigatosporites spp.	I	1.26253	1.35046	1.31694	1.89269	1.9996	1.48599	1.46034	1.42175	1.99482	1.43479	2.47952	1.85418	2.43854	5.89602	3.16348	4.32103	4.5951	3.75872	3.20136	3.15294	3.26859	4.41907	2.04193	2.41557	1.87761	2.7936	2.7462	2.46663	2.18036	1.75238	1.55039	2.16613	3.18039	2.32115	1.79481	4.23465	3.22024	1.73712	1.83833	2.46378	3.36745	2.42634	2.40845	2.15522	2.03971	1.3673	1.27077	1.77522
Cordaitales
Florinites	J	0	0	1.35767	1.94784	1.2904	1.15117	1.25364	1.34498	1.37274	1.35732	2.15867	2.2185	4.13103	5.20814	2.99999	1.88698	3.19438	3.74738	3.33968	3.32358	2.02096	5.02743	1.37663	3.68979	2.26586	4.00845	3.13113	4.10702	1.86156	3.86446	1.76784	2.4496	2.46051	3.27213	1.99236	2.14164	4.66375	2.12738	1.36708	1.24657	1.24335	1.25653	1.2873	1.30491	1.2561	1.75124	1.24153	1.21428
Seed ferns
Vesicaspora	K	0	0	0	0	0	0	0	0.326977	0	0	0	0	0	0	0	0	0	0	0	0	0	0	0	0	1.5659	1.2368	1.34522	1.2514	0	1.23887	0	1.32997	2.26586	1.68185	1.39545	3.77652	1.34832	1.36658	1.39314	1.78416	1.38358	1.75704	2.08585	0	1.39164	2.0827	0	1.24159
[truncated: 28 more columns]
