# Supplementary material
Source: Research Square preprint supplement (doi:10.21203/rs.3.rs-9282628/v1)
Supplement: Supplementary file 3 [file 936fb7268aa37e0e63d13ceb.xlsx]

## Sheet: Binary matrix (C-M&C 2014)
		1	2	3	4	5	6	7	8	9	10	11	12	13	14	15	16	17	18	19	20	21	22	23	24	25	26	27	28	29	30	31	32	33	34	35	36	37	38	39	40	41	42	43	44	45	46	47	48
		PALAEOZOIC																											MESOZOIC
		SILURIAN				DEVONIAN							CARBONIFEROUS							PERMIAN									TRIASSIC							JURASSIC											CRETACEOUS
		Wenlock	Ludlow		Pridoli	Early			Middle		Late		Mississippian			Pennsylvanian				Cisuralian				Guadalupian			Lopingian		Early		Middle		Late			Early				Middle				Late			Early
		Homerian	Gorstian	Ludfordian		Lochkovian	Pragian	Emsian	Eifelian	Givetian	Frasnian	Famennian	Tournaisian	Visiean	Serpukhovian	Bashkirian	Moskovian	Kasimovian	Gzhelian	Asselian	Sakmarian	Artinskian	Kungurian	Roadian	Wordian	Capitanian	Wuchiapingian	Changhsingian	Induan	Olenekian	Anisian	Ladinian	Carnian	Norian	Rhaetian	Hettangian	Sinemurian	Pliensbachian	Toarcian	Aalenian	Bajocian	Bathonian	Callovian	Oxfordian	Kimmeridgian	Tithonian	Berriasian	Valanginian	Hauterivian
	PLANT FAMILIES	HOM	GOR	LUF	PRI	LOK	PRA	EMS	EIF	GIV	FRS	FAM	TOU	VIS	SPK	BSH	MOS	KAS	GZE	ASS	SAK	ART	KUN	ROA	WOR	CAP	WUC	CHN	IND	OLN	ANS	LAD	CRN	NOR	RHT	HET	SIN	PLB	TOA	AAL	BAJ	BTH	CLV	OXF	KIM	TTH	BER	VLG	HAU
	Age (base of stage), Ma (2026)	430.6	426.7	425	422.7	419.62	413.03	410.62	393.47	387.95	382.31	372.15	358.86	346.7	330.3	323.4	315.2	307	303.7	298.9	293.52	290.1	283.3	274.4	266.9	264.28	259.51	254.14	251.902	249.9	246.7	241.464	237	227.3	205.7	201.4	199.5	192.9	184.2	174.7	170.9	168.2	165.3	161.5	154.8	149.2	143.1	137.05	132.6
	Duration, Myrs (2014)	3.1	1.8	2.6	3.8	8.4	3.2	14.3	5.6	5	10.5	13.3	12.2	15.8	7.7	8	8.2	3.3	4.8	3.9	4.9	6.6	11.2	3.5	3.7	5.3	5.66	1.97	0.97	4	5.2	5	10	18.5	7.2	2	8.5	8.1	8.6	3.8	2	2.2	2.6	6.2	5.2	7.1	5.2	6.9	3.5
	Duration, Myrs (2026)	3.9	1.7	2.3	3.1	6.6	2.4	17.1	5.52	5.64	10.16	13.29	12.16	16.4	6.9	8.2	8.2	3.3	4.8	5.38	3.42	6.8	8.9	7.5	2.62	4.77	5.37	2.238	2.002	3.2	5.236	4.464	9.7	21.6	4.3	1.9	6.6	8.7	9.5	3.8	2.7	2.9	3.8	6.7	5.6	6.1	6.05	4.45	6.83
	No. of family extinctions	0	0	0	0	0	0	2	5	2	1	8	6	6	5	1	1	6	9	4	12	2	1	3	8	0	5	5	12	0	1	1	1	15	3	6	1	0	0	0	0	2	1	2	0	0	0	1	0
	Extinctions/Myr (2014)	N/A	0	0	0	0	0	0.625	0.34965	0.357143	0.2	0.761905	0.451128	0.491803	0.316456	0.12987	0.125	0.731707	2.72727	0.833333	3.07692	0.408163	0.151515	0.267857	2.28571	0	0.943396	0.883392	6.09137	0	0.25	0.192308	0.2	1.5	0.162162	0.833333	0.5	0	0	0	0	1	0.454545	0.769231	0	0	0	0.192308	0
	Extinctions/Myr (2026)	N/A	0	0	0	0	0	0.833333	0.292398	0.362319	0.177305	0.787402	0.451467	0.493421	0.304878	0.144928	0.121951	0.731707	2.72727	0.833333	2.23048	0.584795	0.147059	0.337079	1.06667	0	1.04822	0.931099	5.36193	0	0.3125	0.190985	0.224014	1.54639	0.138889	1.39535	0.526316	0	0	0	0	0.740741	0.344828	0.526316	0	0	0	0.165289	0
	PLANT FAMILIES (SUM)	1	2	5	5	9	16	16	16	16	19	17	23	22	21	32	42	42	37	40	28	29	29	31	26	27	27	22	13	16	20	26	44	30	32	31	30	30	31	32	35	34	33	33	33	34	36	35	37
1	Rhyniaceae	1	1	1	1	1	1	1	1	1	1	x
2	Drepanophycaceae		1	1	1	1	1	1	1	1	1	x
3	Distichophytaceae			1	1	1	1	1	1	1	1	1	x
4	Zosterophyllaceae			1	1	1	1	1	1	1	1	x
5	Hedeiaceae			1	1	1	1	1	x
6	Barinophytaceae					1	1	1	1	1	1	1	1	x
7	Sawdoniaceae					1	1	1	1	1	1	x
8	Gosslingiaceae					1	1	1	x
9	Sciadophytaceae					1	1	1	x
10	Protolepidodendraceae						1	1	1	1	1	1	1	1	1	1	1	1	1	1	1	x
11	Psilophytaceae						1	1	1	1	1	1	x
12	Sporogonitaceae						1	1	1	x
13	Trimerophytaceae						1	1	1	x
14	Hsüaceae						1	1	x
15	Discaliaceae						1	x
16	Horneophytaceae						1	x
17	Haskinsiaceae							1	1	1	1	x
18	Rebskiaceae							1	x
19	Lycopodiaceae								1	1	1	1	1	1	1	1	1	1	1	1	1	1	1	1	1	1	1	1	1	1	1	1	1	1	1	1	1	1	1	1	1	1	1	1	1	1	1	1	1
20	Cladoxylaceae								1	1	1	1	1	x
21	Rhacophytaceae								1	1	1	1	1	x
22	Aneurophytaceae								1	1	1	x
23	Barrandeinaceae								1	1	x
24	Archaeopteridaceae									1	1	1	1	x
25	Ibykaceae									1	1	x
26	Bowmanitaceae										1	1	1	1	1	1	1	1	1	1	1	1	1	1	1	1	x
27	Leptophloeaceae										1	1	x
28	Pseudoborniaceae										1	1	x
29	Protokalonaceae										1	x
30	Selaginellaceae											1	1	1	1	1	1	1	1	1	1	1	1	1	1	1	1	1	1	1	1	1	1	1	1	1	1	1	1	1	1	1	1	1	1	1	1	1	1
31	Stauropteridaceae											1	1	1	1	1	1	x
32	Moresnetiaceae											1	1	1	x
33	Zygopteridaceae											1	1	1	x
34	Cyclostigmaceae											1	x
35	Eviostachyaceae											1	x
36	Lepidocarpaceae												1	1	1	1	1	1	1	1	1	1	1	1	1	1	1	1	x
37	Botryopteridaceae												1	1	1	1	1	1	1	1	1	1	1	1	x
38	Sigillariostrobaceae												1	1	1	1	1	1	1	1	1	1	1	1	x
39	Flemingitaceae												1	1	1	1	1	1	1	1	x
40	Tedeleaceae												1	1	1	1	1	1	1	1	x
41	Corynepteridaceae												1	1	1	1	1	1	x
42	Psalixochlaenaceae												1	1	1	1	1	1	x
43	Protopityaceae												1	1	1	x
44	Archaeocalamitaceae												1	1	x
45	Calamopityaceae												1	1	x
46	Eospermaceae												1	x
47	Genomospermaceae												1	x
48	Asterothecaceae													1	1	1	1	1	1	1	1	1	1	1	x
49	Alethopteridaceae													1	1	1	1	1	1	1	x
50	Potonieaceae													1	1	1	1	1	1	1	x
51	Lyginopteridaceae													1	1	1	1	1	x
52	Cheirostrobaceae													1	x
53	Calamostachyaceae														1	1	1	1	1	1	1	1	1	1	1	1	x
54	Cyclopteridaceae														1	1	1	1	1	1	x
55	Urnatopteridaceae														1	1	1	1	1	1	x
56	Eleutherophyllaceae														1	1	x
57	Isoetaceae															1	1	1	1	1	1	1	1	1	1	1	1	1	1	1	1	1	1	1	1	1	1	1	1	1	1	1	1	1	1	1	1	1	1
58	Anachoropteridaceae															1	1	1	1	1	1	1	1	1	1	1	1	1	x
59	Rufloriaceae															1	1	1	1	1	1	1	1	1	1	1	1	1	x
60	Tingiostachyaceae															1	1	1	1	1	1	1	1	1	x
61	Cordaitanthaceae															1	1	1	1	1	1	1	1	x
62	Phasmatocycadaceae															1	1	1	1	1	1	1	1	x
63	Diaphorodendraceae															1	1	1	1	1	x
64	Miadesmiaceae															1	1	1	1	1	x
65	Neurodontopteridaceae															1	1	1	1	1	x
66	Chaloneriaceae															1	1	1	x
67	Physostomaceae															1	1	x
68	Spenceritaceae															1	1	x
69	Marattiaceae																1	1	1	1	1	1	1	1	1	1	1	1	1	1	1	1	1	1	1	1	1	1	1	1	1	1	1	1	1	1	1	1	1
70	Tchernoviaceae																1	1	1	1	1	1	1	1	1	1	1	1	x
71	Sermeyaceae																1	1	1	1	1	1	1	1	1	1	x
72	Callistophytaceae																1	1	1	1	1	1	1	1	x
73	Biscalithecaceae																1	1	1	1	x
74	Noeggerathiaceae																1	1	1	1	x
75	Sporangiostrobaceae																1	1	x
76	Stephanospermaceae																1	1	x
77	Caudatocarpaceae																1	x
78	Crossothecaceae																1	x
79	Pinakodendraceae																1	x
80	Dicranophyllaceae																	1	1	1	1	x
81	Codonospermaceae																	1	1	x
82	Kaplanopteridaceae																	1	1	x
83	Cecropsidaceae																	1	x
84	Polylophospermaceae																	1	x
85	Thucydiaceae																	1	x
86	Peltaspermaceae																		1	1	1	1	1	1	1	1	1	1	1	1	1	1	1	1	1	x
87	Buriadiaceae																		1	1	1	1	x
88	Bartheliaceae																		1	x
89	Emporiaceae																		1	x
90	Cycadaceae																			1	1	1	1	1	1	1	1	1	1	1	1	1	1	1	1	1	1	1	1	1	1	1	1	1	1	1	1	1	1
91	Ottokariaceae																			1	1	1	1	1	1	1	1	1	x
92	Cyclodendraceae																			1	1	1	1	1	1	1	1	x
93	Vojnovskyaceae																			1	1	1	1	1	1	1	x
94	Utrechtiaceae																			1	1	1	1	1	x
95	Trichopityaceae																			1	1	1	1	x
96	Ferugliocladaceae																			1	x
97	Gleicheniaceae																					1	1	1	1	1	1	1	1	1	1	1	1	1	1	1	1	1	1	1	1	1	1	1	1	1	1	1	1
98	Emplectopteridaceae																					1	1	1	1	1	1	x
99	Arberiaceae																					1	1	1	x
100	Gigantopteridaceae																						1	1	1	1	1	1	x
101	Voltziaceae																							1	1	1	1	1	1	1	1	1	1	1	1	1	1	1	1	1	1	1	1	1	1	1	1	1	1
102	Dictyopteridaceae																							1	1	1	1	1	x
103	Lidgettoniaceae																							1	1	1	1	1	x
104	Sphenophyllaceae																							1	1	1	1	1	x
105	Majonicaceae																							1	x
106	Osmundaceae																								1	1	1	1	1	1	1	1	1	1	1	1	1	1	1	1	1	1	1	1	1	1	1	1	1
107	Cardiolepidiaceae																								1	1	1	1	x
108	Gondwanostachyaceae																								1	1	x
109	Nystroemiaceae																									1	1	x
110	Equisetaceae																										1	1	1	1	1	1	1	1	1	1	1	1	1	1	1	1	1	1	1	1	1	1	1
111	Guaireaceae																										1	1	x
112	Skaaripteridaceae																										1	1	x
113	Rigbyaceae																										1	x
114	Ullmanniaceae																										1	x
115	Pleuromeiaceae																												1	1	1	1	1	x
116	Echinostachyaceae																												1	1	1	x
117	Takhtajanodoxaceae																												1	1	x
118	Ginkgoaceae																													1	1	1	1	1	1	1	1	1	1	1	1	1	1	1	1	1	1	1	1
119	Kannaskoppiaceae																													1	1	1	1	1	1	x
120	Umkomasiaceae																													1	1	1	1	1	1	x
121	Araucariaceae																														1	1	1	1	1	1	1	1	1	1	1	1	1	1	1	1	1	1	1
122	Pinaceae																														1	1	1	1	1	1	1	1	1	1	1	1	1	1	1	1	1	1	1
123	Podocarpaceae																														1	1	1	1	1	1	1	1	1	1	1	1	1	1	1	1	1	1	1
124	Caytoniaceae																														1	1	1	1	1	1	1	1	1	1	1	1	1	1	1	1	1	1	1
125	Fredlindiaceae																														1	1	1	x
126	Cupressaceae																															1	1	1	1	1	1	1	1	1	1	1	1	1	1	1	1	1	1
127	Dipteridaceae																															1	1	1	1	1	1	1	1	1	1	1	1	1	1	1	1	1	1
128	Matoniaceae																															1	1	1	1	1	1	1	1	1	1	1	1	1	1	1	1	1	1
129	Fraxinopsiaceae																															1	1	1	1	x
130	Dordrechtitaceae																															1	1	x
131	Lindthecaceae																															1	1	x
132	Petriellaeaceae																															1	x
133	Hymenophyllaceae																																1	1	1	1	1	1	1	1	1	1	1	1	1	1	1	1	1
134	Polypodiaceae																																1	1	1	1	1	1	1	1	1	1	1	1	1	1	1	1	1
135	Cheirolepidiaceae																																1	1	1	1	1	1	1	1	1	1	1	1	1	1	1	1	1
136	Williamsoniaceae																																1	1	1	1	1	1	1	1	1	1	1	1	1	1	1	x
137	Palissyaceae																																1	1	1	1	1	1	1	1	1	x
138	Bennetticarpaceae																																1	1	1	x
139	Dinophytonaceae																																1	1	x
140	Laurozamitaceae																																1	1	x
141	Alexiaceae																																1	x
142	Avatiaceae																																1	x
143	Cynepteridaceae																																1	x
144	Dechellyiaceae																																1	x
145	Hamshawviaceae																																1	x
146	Hlatimbiaceae																																1	x
147	Matatiellaceae																																1	x
148	Nataligmaceae																																1	x
149	Sturianthaceae																																1	x
150	Westerheimiaceae																																1	x
151	Zamiostrobaceae																																1	x
152	Axelrodiaceae																																	1	x
153	Dicksoniaceae																																		1	1	1	1	1	1	1	1	1	1	1	1	1	1	1
154	Leptostrobaceae																																		1	1	1	1	1	1	1	1	1	1	1	1	1	1	1
155	Umaltolepidiaceae																																		1	1	1	1	1	1	1	1	1	1	1	1	1	1	1
156	Williamsoniellaceae																																		1	1	1	1	1	1	1	x
157	Vardekloeftiaceae																																		1	x
158	Taxaceae																																			1	1	1	1	1	1	1	1	1	1	1	1	1	1
159	Karkeniaceae																																			1	1	1	1	1	1	1	1	1	1	1	1	1	1
160	Schmeissneriaceae																																			1	1	1	1	1	1	1	1	x
161	Yimaiaceae																																			1	1	1	1	1	1	1	x
162	Bernettiaceae																																			1	x
163	Pentoxylaceae																																						1	1	1	1	1	1	1	1	1	1	1
164	Pararaucariaceae																																							1	1	1	1	x
165	Schizaeaceae																																								1	1	1	1	1	1	1	1	1
166	Stangeriaceae																																								1	1	1	1	1	1	1	1	1
167	Taxodiaceae																																								1	1	1	1	1	1	1	1	1
168	Cephalotaxaceae																																									1	1	1	1	1	1	1	1
169	Sciadopityaceae																																											1	1	1	1	1	1
170	Dirhopalostachyaceae																																											1	1	1	1	1	1
171	Cycadeoideaceae																																													1	1	1	1
172	Loxsomaceae																																														1	1	1
173	Tempskyaceae																																														1	1	1
174	Cyatheaceae																																																1
175	Zamiaceae																																																1
176	Araceae
177	Chloranthaceae
178	Ephedraceae
179	Nymphaeaceae
180	Welwitschiaceae
181	Eoanthaceae
182	Lophosoriaceae
183	Archaeofructaceae
184	Drewriaceae
185	Ceratophyllaceae
186	Lauraceae
187	Magnoliaceae
188	Nelumbonaceae
189	Platanaceae
190	Priscaceae
191	Schisandraceae
192	Actinidiaceae
193	Clusiaceae
194	Marsileaceae
195	Menispermaceae
196	Sabiaceae
197	Sapindaceae
198	Triuridaceae
199	Trochodendraceae
200	Annonaceae
201	Capparaceae
202	Monimiaceae
203	Amaranthaceae
204	Arecaceae
205	Aristolochiaceae
206	Cornaceae
207	Cunoniaceae
208	Fagaceae
209	Hamamelidaceae
210	Winteraceae
211	Zingiberaceae
212	Alismataceae
213	Atherospermataceae
214	Haloragaceae
215	Nothofagaceae
216	Nyssaceae
217	Pentaphyllacaceae
218	Rhamnaceae
219	Rhoipteleaceae
220	Aceraceae
221	Aquifoliaceae
222	Araliaceae
223	Azollaceae
224	Cannabaceae
225	Cercidiphyllaceae
226	Clethraceae
227	Cyrillaceae
228	Dioscoreaceae
229	Ericaceae
230	Flacourtiaceae
231	Moraceae
232	Pandanaceae
233	Poaceae
234	Rosaceae
235	Rutaceae
236	Salviniaceae
237	Simaroubaceae
238	Stemonaceae
239	Tetramelaceae
240	Theaceae
241	Typhaceae
242	Urticaceae
243	Akaniaceae
244	Betulaceae
245	Blechnaceae
246	Cucurbitaceae
247	Dennstaedtiaceae
248	Dryopteridaceae
249	Juglandaceae
250	Lecythidaceae
251	Oleaceae
252	Ophioglossaceae
253	Ulmaceae
254	Cyperaceae
255	Casuarinaceae
256	Eucryphiaceae
257	Eupteleaceae
258	Fabaceae
259	Hydrocharitaceae
260	Icacinaceae
261	Lemnaceae
262	Mimosaceae
263	Myrtaceae
264	Onocleaceae
265	Polygalaceae
266	Salicaceae
267	Thymelaeaceae
268	Vitaceae
269	Adoxaceae
270	Alangiaceae
271	Altingiaceae
272	Anacardiaceae
273	Apocynaceae
274	Boraginaceae
275	Burseraceae
276	Caprifoliaceae
277	Celastraceae
278	Combretaceae
279	Dilleniaceae
280	Elaeocarpaceae
281	Euphorbiaceae
282	Lythraceae
283	Melastomataceae
284	Meliaceae
285	Musaceae
286	Myricaceae
287	Myrsinaceae
288	Olacaceae
289	Proteaceae
290	Pteridaceae
291	Rhizophoraceae
292	Sapotaceae
293	Sterculiaceae
294	Symplocaceae
295	Thelypteridaceae
296	Caesalpiniaceae
297	Caryophyllaceae
298	Cyclanthaceae
299	Cymodoceaceae
300	Dipterocarpaceae
301	Ebenaceae
302	Grossulariaceae
303	Hydrangeaceae
304	Loranthaceae
305	Malpighiaceae
306	Myristicaceae
307	Papaveraceae
308	Potamogetonaceae
309	Rubiaceae
310	Santalaceae
311	Saururaceae
312	Smilacaceae
313	Solanaceae
314	Tiliaceae
315	Buxaceae
316	Cabombaceae
317	Cistaceae
318	Eucommiaceae
319	Pontederiaceae
320	Scrophulariaceae
321	Sparganiaceae
322	Acanthaceae
323	Asclepiadaceae
324	Bignoniaceae
325	Iteaceae
326	Juncaceae
327	Malvaceae
328	Onagraceae
329	Surianaceae
330	Tapisciaceae
331	Aponogetonaceae
332	Berberidaceae
333	Bombacaceae
334	Brassicaceae
335	Butomaceae
336	Droseraceae
337	Hippuridaceae
338	Lamiaceae
339	Menyanthaceae
340	Ranunculaceae
341	Sargentodoxaceae
342	Staphyleaceae
343	Taccaceae
344	Violaceae
345	Primulaceae
346	Trapaceae
347	Asteraceae
348	Garryaceae
349	Lardizabalaceae
350	Leitneriaceae
351	Pedaliaceae
352	Piperaceae
353	Valerianaceae
354	Xyridaceae
355	Zannichelliaceae
356	Connaraceae
357	Coriariaceae
358	Polygonaceae
359	Apiaceae
360	Asparagaceae
361	Calycanthaceae
362	Chenopodiaceae
363	Commelinaceae
364	Elaeagnaceae
365	Loganiaceae
366	Paeoniaceae
367	Passifloraceae
368	Stachyuraceae
369	Campanulaceae
370	Crypteroniaceae
371	Daphniphyllaceae
372	Empetraceae
373	Hippocastanaceae
374	Viscaceae
375	Fumariaceae
376	Tamaricaceae
377	Callitrichaceae
378	Chrysobalanaceae
379	Dipsacaceae
380	Elatinaceae
381	Oxalidaceae
382	Plantaginaceae
383	Podostemaceae
384	Saxifragaceae
385	Iridaceae
386	Lentibulariaceae
387	Gnetaceae
"x" indicates the first stage for which a given plant family has not been found. This means that this family went extinct within or at the end of the preceding stage.
[truncated: 28 more columns]

## Sheet: Data summary
Stage	Age (base of stage), Ma (2026)	Extinctions/Myr (2014)	Extinctions/Myr (2026)
Lochkovian	419.62	0	0
Pragian	413.03	0	0
Emsian	410.62	0.625	0.833333
Eifelian	393.47	0.34965	0.292398
Givetian	387.95	0.357143	0.362319
Frasnian	382.31	0.2	0.177305
Famennian	372.15	0.761905	0.787402
Tournaisian	358.86	0.451128	0.451467
Visiean	346.7	0.491803	0.493421
Serpukhovian	330.3	0.316456	0.304878
Bashkirian	323.4	0.12987	0.144928
Moskovian	315.2	0.125	0.121951
Kasimovian	307	0.731707	0.731707
Gzhelian	303.7	2.72727	2.72727
Asselian	298.9	0.833333	0.833333
Sakmarian	293.52	3.07692	2.23048
Artinskian	290.1	0.408163	0.584795
Kungurian	283.3	0.151515	0.147059
Roadian	274.4	0.267857	0.337079
Wordian	266.9	2.28571	1.06667
Capitanian	264.28	0	0
Wuchiapingian	259.51	0.943396	1.04822
Changhsingian	254.14	0.883392	0.931099
Induan	251.902	6.09137	5.36193
Olenekian	249.9	0	0
Anisian	246.7	0.25	0.3125
Ladinian	241.464	0.192308	0.190985
Carnian	237	0.2	0.224014
Norian	227.3	1.5	1.54639
Rhaetian	205.7	0.162162	0.138889
Hettangian	201.4	0.833333	1.39535
Sinemurian	199.5	0.5	0.526316
Pliensbachian	192.9	0	0
Toarcian	184.2	0	0
Aalenian	174.7	0	0
Bajocian	170.9	0	0
Bathonian	168.2	1	0.740741
Callovian	165.3	0.454545	0.344828
Oxfordian	161.5	0.769231	0.526316
Kimmeridgian	154.8	0	0
Tithonian	149.2	0	0
Berriasian	143.1	0	0
Valanginian	137.05	0.192308	0.165289
Hauterivian	132.6	0	0
Barremian	125.77	0	0
Aptian	121.4	0	0
Albian	113.2	0.416667	0.609756
Cenomanian	100.5	0.08	0.0787402
Turonian	93.9	0.606061	0.606061
Coniacian	89.8	0	0
Santonian	85.7	0	0
Campanian	83.6	0.37037	0.47619
Maastrichtian	72.2	0.26087	0.263158

## Sheet: Stats - 2026 Stages
Statistic	Value
Mean	0.565971
Standard error	0.138945
Median	0.26087
Mode	0
Standard deviation	1.01153
Sample variance	1.0232
Kurtosis	17.5419
Skewness	3.8055
Range	6.09137
Minimum	0
Maximum	6.09137
Sum	29.9965
Count	53
Confidence level (95%)	0.278813
Upper confidence interval (95%)	0.844783
Lower confidence interval (95%)	0.287158
Confidence level (99%)	0.371501
Upper confidence interval (99%)	0.937472
Lower confidence interval (99%)	0.19447
