# Supplementary material
Source: Research Square preprint supplement (doi:10.21203/rs.3.rs-9282628/v1)
Supplement: Supplementary file 4 [file c124e38dfa818b01500ec3fa.xlsx]

## Sheet: end-K
Genus	species
Aquilapollenites	quadrilobus
Aquilapollenites	minimus
Tricolpites	microreticulatus

## Sheet: end-T
Genus	species
Lepidopteris	indica
Lepidopteris	stormbergensis
Lepidopteris	africana
Lepidopteris	murtonii
Lepidopteris	ferganensis
Lepidopteris	parvula
Lepidopteris	stuttgartiensis

## Sheet: mid-Penn
Genus	species
Gangamopteris	angustifolia
Gangamopteris	kashmirensis
Gangamopteris	cyclopteroides
Glossopteris	indica
Glossopteris	communis
Gangamopteris	intermedia
Glossopteris	nishatbaghensis
Glossopteris	obliqua
Glossopteris	talchirensis
Gangamopteris	buriadica
Gangamopteris	clarkeana
Gangamopteris	fibrosa
Gangamopteris	major
Glossopteris	decipiens
Glossopteris	divergens
Glossopteris	elongata
Glossopteris	formosa
Glossopteris	intermittens
Glossopteris	nimishea
Glossopteris	obovata
Glossopteris	raniganjensis
Glossopteris	stipanicicii
Glossopteris	zeilleri
Glossopteris	conspicua
Glossopteris	damudica
Glossopteris	feistmantelii
Glossopteris	intermedia
Glossopteris	leptoneura
Glossopteris	longicaulis
Glossopteris	retifera
Glossopteris	rewaensis
Glossopteris	stricta
Glossopteris	taeniopteroides
Glossopteris	angustifolia
Glossopteris	browniana
Gangamopteris	gondwanensis
Gangamopteris	karharbariensis
Gangamopteris	mucronata
Gangamopteris	oblanceolata
Gangamopteris	srivastavae
Glossopteris	angusta
Glossopteris	fibrosa
Glossopteris	giridihensis
Glossopteris	jayantiensis
Glossopteris	karharbariensis
Glossopteris	recurva
Glossopteris	spathulocordata
Gondwanidium	indicum
Gondwanidium	validum
Rubidgea	emarginata
Rubidgea	lanceolatus
Rubidgea	obovata
Gangamopteris	hispida
Gangamopteris	spathulata
Glossopteris	pandurata
Glossopteris	taeniensis
Gangamopteris	chatterjei
Gangamopteris	media
Gangamopteris	obtusifolia
Gangamopteris	papillosa
Glossopteris	bansloiensis
Glossopteris	bargoensis
Glossopteris	churiensis
Glossopteris	karanpurensis
Glossopteris	linearis
Glossopteris	nakkarea
Glossopteris	parallela
Glossopteris	barakarensis
Glossopteris	emarginata
Glossopteris	ingens
Glossopteris	oldhamii
Glossopteris	saksenae
Glossopteris	syaldiensis
Glossopteris	tortuosa
Glossopteris	ampla
Gangamopteris	indica
Gangamopteris	whittiana
Glossopteris	acaulis
Glossopteris	arberi
Glossopteris	brongniartii
Glossopteris	contracta
Glossopteris	cordiformis
Glossopteris	frondosa
Glossopteris	ghusikensis
Glossopteris	gigas
Glossopteris	gondwanensis
Glossopteris	isolateralis
Glossopteris	lanceolatus
Glossopteris	maculata
Glossopteris	major
Glossopteris	nautiyalii
Glossopteris	pantii
Glossopteris	petiolata
Glossopteris	pseudocommunis
Glossopteris	radiata
Glossopteris	reticulata
Glossopteris	rhabdotaenioides
Glossopteris	sahnii
Glossopteris	sastrii
Glossopteris	searsolensis
Glossopteris	srivastavae
Glossopteris	subtilis
Glossopteris	taenioides
Glossopteris	tenuifolia
Glossopteris	varia
Glossopteris	vulgaris
Glossopteris	bosei
Glossopteris	gopadensis
Glossopteris	spatulata
Glossopteris	tenuinervis
Glossopteris	schopfii
Glossopteris	skaarensis
Gangamopteris	anthrophyoides
Gangamopteris	hughesii
Glossopteris	acuminata
Glossopteris	anthrophyoides
Glossopteris	dhenkanalensis
Glossopteris	euryneura
Glossopteris	hinjridaensis
Glossopteris	inaequalis
Glossopteris	kamthiensis
Glossopteris	maheshwarii
Glossopteris	mohudaensis
Glossopteris	orbicularis
Glossopteris	ornatus
Glossopteris	retusa
Glossopteris	shailae
Glossopteris	surangei
Glossopteris	utkalensis
Glossopteris	venustus
Glossopteris	musaefolia
Glossopteris	nilssonioides
Glossopteris	papillosa
Glossopteris	senii
Glossopteris	sidhiensis

## Sheet: end-P
Genus	species
Stigmaria	ficoides
Lepidodendropsis	hirmeri
Lepidodendron	aculeatum
Lepidodendron	obovatum
Lepidophloios	laricinus
Lepidostrobus	majus
Lepidostrobus	ornatus
Ulodendron	majus
Lepidodendron	gundensis
Lepidostrobus	kashmirensis

## Sheet: late-D
Genus	species
Actinopodium	nathorstii
Svalbardia	polymorpha
Svalbardia	scotica
Svalbardia	avelinesiana
Svalbardia	banksii
Actinoxylon	banksii
Archaeopteris	boyi
Archaeopteris	hibernica
Callixylon	trifilievi
Eddya	sullivanensis
Siderella	scotti
